# Supplementary material for: GDF11 administration does not extend lifespan in a mouse model of premature aging
Source: PubMed Central journal article supplement (PMC5302888; doi:10.18632/oncotarget.11096), 2016-08-05
Supplement: oncotarget-07-55951-s001.pdf [file oncotarget-07-55951-s001.pdf]

# GDF11 administration does not extend lifespan in a mouse model of premature aging

## Supplementary Material

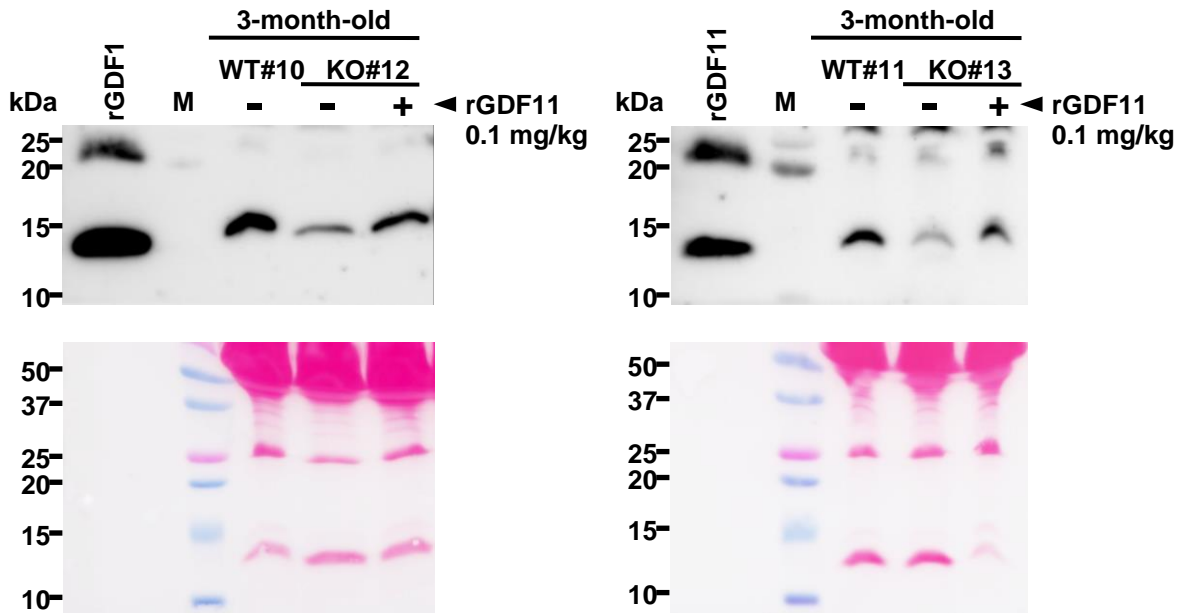

**Figure S1. rGDF11 intraperitoneal administration increases GDF11/8 plasma levels in *Zmpste24*<sup>-/-</sup> mice.** GDF11/8 plasma levels of 3-month-old *Zmpste24*<sup>-/-</sup> mice were evaluated by western-blot analysis before and 2 hours after a single intraperitoneal injection of 0.1 mg/kg of rGDF11. GDF11/8 plasma levels of wild-type littermate mice are shown as a reference. 2 ng of rGDF11 loaded as a positive control. Ponceau S stained membranes of the corresponding western-blot are shown to demonstrate equivalent loading (bottom). # indicates mouse number. M indicates molecular weight marker.
